# Supplementary material for: Capabilities and limitations of Pb, Sr and Fe isotopic analysis of iron-rich slags: a case study on the medieval port at Hoeke (Belgium)
Source: Royal Society of Chemistry journal article supplement (doi:10.1039/d4ra02887b), 2024-01-01
Supplement: d4ra02887b1.pdf [file d4ra02887b1.pdf]

## Capabilities and limitations of Pb, Sr and Fe isotopic analysis of iron-rich slags: a case study on the Medieval port at Hoeke (Belgium)

Paulina Biernacka,<sup>a,b</sup> Marta Costas-Rodríguez,<sup>a,c</sup> Wim De Clercq,<sup>b</sup> Stijn Dewaele<sup>d</sup>, Johan De Grave<sup>d</sup>, Frank Vanhaecke\*<sup>a</sup>

<sup>a</sup> Ghent University, Department of Chemistry, Atomic & Mass Spectrometry – A&MS research unit, Campus Sterre, Krijgslaan 281 – S12, 9000 Ghent, Belgium.

<sup>b</sup> Historical Archaeology Research Group, Department of Archaeology, Ghent University, St.-Pietersnieuwstraat 35, 9000 Ghent, Belgium.

<sup>c</sup> Centro de Investigación Mariña, Universidade de Vigo, Departamento de Química Analítica y Alimentaria, Grupo QA2, 36310 Vigo, Spain.

<sup>d</sup> Laboratory for Mineralogy and Petrology, Department of Geology, Ghent University, Krijgslaan 281 S8, 9000, Ghent, Belgium

\* Corresponding author's e-mail: [frank.vanhaecke@ugent.be](mailto:frank.vanhaecke@ugent.be)

**Table S1: Lead and strontium concentrations and isotopic signatures of the iron slag, hammer scale, clay and coal samples investigated.**

| Sample | Type | Pb, $\mu\text{g g}^{-1}$ | $^{206}\text{Pb}/^{204}\text{Pb}$ | $^{207}\text{Pb}/^{204}\text{Pb}$ | $^{208}\text{Pb}/^{204}\text{Pb}$ | $^{207}\text{Pb}/^{206}\text{Pb}$ | $^{208}\text{Pb}/^{206}\text{Pb}$ | $^{208}\text{Pb}/^{207}\text{Pb}$ | $^{206}\text{Pb}/^{207}\text{Pb}$ | Sr, $\mu\text{g g}^{-1}$ | $^{87}\text{Sr}/^{86}\text{Sr}$ |
|--------|------|--------------------------|-----------------------------------|-----------------------------------|-----------------------------------|-----------------------------------|-----------------------------------|-----------------------------------|-----------------------------------|--------------------------|---------------------------------|
| 1      | slag | 18.40                    | 18.5107                           | 15.6511                           | 38.5591                           | 0.8455                            | 2.0831                            | 2.4637                            | 1.1827                            | 45.56                    | 0.7127                          |
| 2      | slag | 73.12                    | 18.3826                           | 15.6118                           | 38.3743                           | 0.8493                            | 2.0875                            | 2.4580                            | 1.1775                            | 347.58                   | 0.7100                          |
| 3      | slag | 30.94                    | 18.5831                           | 15.6533                           | 38.5862                           | 0.8423                            | 2.0764                            | 2.4651                            | 1.1872                            | 94.39                    | 0.7110                          |
| 4      | slag | 11.77                    | 18.6340                           | 15.6703                           | 38.5752                           | 0.8409                            | 2.0701                            | 2.4617                            | 1.1891                            | 72.78                    | 0.7220                          |
| 5      | slag | 25.92                    | 18.5129                           | 15.6553                           | 38.5776                           | 0.8456                            | 2.0838                            | 2.4642                            | 1.1825                            | 82.30                    | 0.7154                          |
| 6      | slag | 67.20                    | 18.6328                           | 15.6677                           | 38.7262                           | 0.8409                            | 2.0784                            | 2.4717                            | 1.1892                            | 353.51                   | 0.7102                          |
| 7      | slag | 12.84                    | 18.3973                           | 15.6198                           | 38.4460                           | 0.8490                            | 2.0898                            | 2.4614                            | 1.1778                            | 82.44                    | 0.7138                          |
| 8      | slag | 198.02                   | 18.4424                           | 15.6303                           | 38.4892                           | 0.8475                            | 2.0870                            | 2.4625                            | 1.1799                            | 149.93                   | 0.7189                          |
| 9      | slag | 29.88                    | 18.7021                           | 15.6647                           | 38.8211                           | 0.8376                            | 2.0758                            | 2.4783                            | 1.1939                            | 160.01                   | 0.7162                          |
| 10     | slag | 68.68                    | 18.8226                           | 15.6765                           | 38.8811                           | 0.8329                            | 2.0657                            | 2.4802                            | 1.2007                            | 97.37                    | 0.7175                          |
| 11     | slag | 26.13                    | 18.5356                           | 15.6498                           | 38.5258                           | 0.8443                            | 2.0785                            | 2.4617                            | 1.1844                            | 179.40                   | 0.7176                          |
| 12     | slag | 12.65                    | 18.5331                           | 15.6668                           | 38.5566                           | 0.8453                            | 2.0804                            | 2.4610                            | 1.1830                            | 89.26                    | 0.7108                          |
| 041    | slag | 21.26                    | 18.4369                           | 15.6685                           | 38.2733                           | 0.8498                            | 2.0759                            | 2.4427                            | 1.1767                            | 158.13                   | 0.7199                          |
| 043    | slag | 19.26                    | 18.4422                           | 15.6681                           | 38.4789                           | 0.8496                            | 2.0865                            | 2.4559                            | 1.1771                            | 118.64                   | 0.7172                          |
| 047    | slag | 3.66                     | 18.2230                           | 15.6323                           | 38.2629                           | 0.8578                            | 2.0997                            | 2.4477                            | 1.1657                            | 48.55                    | 0.7114                          |
| 051    | slag | 31.33                    | 17.9462                           | 15.6327                           | 37.9271                           | 0.8711                            | 2.1134                            | 2.4261                            | 1.1480                            | 73.58                    | 0.7148                          |
| 041-A  | slag | 1.68                     | 18.3346                           | 15.6672                           | 38.3650                           | 0.8545                            | 2.0925                            | 2.4487                            | 1.1703                            | 77.98                    | 0.7194                          |
| 041-B  | slag | 2.95                     | 18.4583                           | 15.6691                           | 38.4612                           | 0.8489                            | 2.0837                            | 2.4546                            | 1.1780                            | 112.92                   | 0.7195                          |

| Sample     | Type    | Pb, $\mu\text{g g}^{-1}$ | $^{206}\text{Pb}/^{204}\text{Pb}$ | $^{207}\text{Pb}/^{204}\text{Pb}$ | $^{208}\text{Pb}/^{204}\text{Pb}$ | $^{207}\text{Pb}/^{206}\text{Pb}$ | $^{208}\text{Pb}/^{206}\text{Pb}$ | $^{208}\text{Pb}/^{207}\text{Pb}$ | $^{206}\text{Pb}/^{207}\text{Pb}$ | Sr, $\mu\text{g g}^{-1}$ | $^{87}\text{Sr}/^{86}\text{Sr}$ |
|------------|---------|--------------------------|-----------------------------------|-----------------------------------|-----------------------------------|-----------------------------------|-----------------------------------|-----------------------------------|-----------------------------------|--------------------------|---------------------------------|
| 041-C      | slag    | 0.88                     | 18.4333                           | 15.6727                           | 38.4006                           | 0.8502                            | 2.0832                            | 2.4502                            | 1.1761                            | 70.44                    | 0.7196                          |
| 042        | slag    | 0.79                     | 18.5558                           | 15.6628                           | 38.5285                           | 0.8441                            | 2.0764                            | 2.4599                            | 1.1847                            | 26.15                    | 0.7194                          |
| 043-A      | slag    | 4.41                     | 18.3164                           | 15.6508                           | 38.3629                           | 0.8545                            | 2.0945                            | 2.4512                            | 1.1703                            | 89.59                    | 0.7166                          |
| 043-B      | slag    | 0.09                     | 18.4256                           | 15.6583                           | 38.4545                           | 0.8498                            | 2.0870                            | 2.4559                            | 1.1767                            | 14.25                    | 0.7174                          |
| 047        | slag    | 3.20                     | 18.2148                           | 15.6294                           | 38.3064                           | 0.8581                            | 2.1030                            | 2.4509                            | 1.1654                            | 40.61                    | 0.7106                          |
| 048        | slag    | 2.34                     | 18.0888                           | 15.6467                           | 38.1303                           | 0.8650                            | 2.1080                            | 2.4370                            | 1.1561                            | 143.67                   | 0.7180                          |
| 050        | slag    | 4.40                     | 18.4902                           | 15.6680                           | 38.5406                           | 0.8474                            | 2.0844                            | 2.4598                            | 1.1801                            | 139.11                   | 0.7154                          |
| 051        | slag    | 3.11                     | 18.4072                           | 15.6553                           | 38.4472                           | 0.8505                            | 2.0887                            | 2.4559                            | 1.1758                            | 86.25                    | 0.7160                          |
| 1.1.C.1    | slag    | 65.79                    | 18.6403                           | 15.6609                           | 38.6147                           | 0.8402                            | 2.0716                            | 2.4657                            | 1.1902                            | 82.64                    | 0.7111                          |
| 1.1.C.1.A  | slag    | 18.85                    | 18.4364                           | 15.6366                           | 38.4086                           | 0.8481                            | 2.0833                            | 2.4563                            | 1.1791                            | 23.92                    | 0.7119                          |
| 1.2.B      | slag    | 26.68                    | 18.5263                           | 15.6554                           | 38.5523                           | 0.8450                            | 2.0809                            | 2.4626                            | 1.1834                            | 57.18                    | 0.7153                          |
| 1.2.C.1    | slag    | 6.75                     | 18.4699                           | 15.6774                           | 38.4605                           | 0.8488                            | 2.0823                            | 2.4532                            | 1.1781                            | 8.30                     | 0.7175                          |
| 1.2.D.1    | slag    | 15.84                    | 18.4375                           | 15.6787                           | 38.4570                           | 0.8504                            | 2.0858                            | 2.4528                            | 1.1760                            | 174.59                   | 0.7211                          |
| 1.2.D.2    | slag    | 16.11                    | 18.5552                           | 15.6682                           | 38.5707                           | 0.8444                            | 2.0787                            | 2.4617                            | 1.1843                            | 98.62                    | 0.7180                          |
| 1.2.E.1    | slag    | 11.82                    | 18.3481                           | 15.6314                           | 38.3068                           | 0.8519                            | 2.0878                            | 2.4506                            | 1.1738                            | 58.33                    | 0.7154                          |
| 1.2.G.2    | slag    | 149.62                   | 18.6900                           | 15.6603                           | 38.7431                           | 0.8379                            | 2.0729                            | 2.4740                            | 1.1935                            | 21.94                    | 0.7196                          |
| 1.2.G.2.A  | slag    | 118.23                   | 18.5404                           | 15.6699                           | 38.6009                           | 0.8452                            | 2.0820                            | 2.4634                            | 1.1832                            | 536.65                   | 0.7194                          |
| 2.B        | slag    | 11.43                    | 18.4544                           | 15.6509                           | 38.3893                           | 0.8481                            | 2.0802                            | 2.4529                            | 1.1791                            | 96.98                    | 0.7219                          |
| 2.C.2      | slag    | 7.36                     | 18.5087                           | 15.6282                           | 38.3096                           | 0.8444                            | 2.0698                            | 2.4513                            | 1.1843                            | 110.45                   | 0.7193                          |
| 2.D.1      | slag    | 23.19                    | 18.6623                           | 15.6726                           | 38.5702                           | 0.8398                            | 2.0667                            | 2.4610                            | 1.1908                            | 95.46                    | 0.7206                          |
| 2.D.1.A    | slag    | 12.28                    | 18.5129                           | 15.6601                           | 38.4114                           | 0.8459                            | 2.0748                            | 2.4528                            | 1.1822                            | 107.08                   | 0.7206                          |
| 2.E.1      | slag    | 16.98                    | 18.6480                           | 15.6776                           | 38.6948                           | 0.8407                            | 2.0750                            | 2.4682                            | 1.1895                            | 120.58                   | 0.7216                          |
| 2.F.1.A    | slag    | 51.01                    | 18.5092                           | 15.6528                           | 38.5337                           | 0.8457                            | 2.0819                            | 2.4618                            | 1.1825                            | 111.37                   | 0.7155                          |
| 2.G.3      | slag    | 17.28                    | 18.4821                           | 15.6474                           | 38.3270                           | 0.8466                            | 2.0737                            | 2.4494                            | 1.1812                            | 112.44                   | 0.7219                          |
| 2.H.1      | slag    | 5.45                     | 18.3228                           | 15.6735                           | 38.2881                           | 0.8554                            | 2.0896                            | 2.4429                            | 1.1690                            | 45.81                    | 0.7190                          |
| 2.H.1.A    | slag    | 12.63                    | 18.4239                           | 15.6513                           | 38.4063                           | 0.8495                            | 2.0846                            | 2.4539                            | 1.1771                            | 45.93                    | 0.7196                          |
| 2.I        | slag    | 12.62                    | 18.4347                           | 15.6447                           | 38.3942                           | 0.8486                            | 2.0827                            | 2.4541                            | 1.1783                            | 39.22                    | 0.7154                          |
| 2A         | slag    | 14.69                    | 18.5383                           | 15.6727                           | 38.5022                           | 0.8454                            | 2.0769                            | 2.4566                            | 1.1828                            | 147.58                   | 0.7180                          |
| 2F         | slag    | 25.01                    | 18.5085                           | 15.6680                           | 38.5587                           | 0.8465                            | 2.0833                            | 2.4610                            | 1.1813                            | 170.39                   | 0.7154                          |
| PCB        | slag    | 13.00                    | 18.3947                           | 15.6367                           | 38.3420                           | 0.8501                            | 2.0844                            | 2.4521                            | 1.1764                            | 95.52                    | 0.7148                          |
| 048-yellow | surface | 5.04                     | 18.5824                           | 15.6668                           | 38.6312                           | 0.8431                            | 2.0789                            | 2.4658                            | 1.1861                            | 93.02                    | 0.7138                          |
| 051-yellow | surface | 6.80                     | 18.6530                           | 15.6806                           | 38.7283                           | 0.8406                            | 2.0763                            | 2.4698                            | 1.1896                            | 305.87                   | 0.7105                          |
| 1.1.A      | surface | 25.46                    | 18.4905                           | 15.6620                           | 38.6395                           | 0.8470                            | 2.0897                            | 2.4671                            | 1.1806                            | 161.19                   | 0.7110                          |
| 1.1.A      | surface | 110.28                   | 18.9191                           | 15.6946                           | 38.9533                           | 0.8296                            | 2.0589                            | 2.4820                            | 1.2054                            | 56.43                    | 0.7150                          |

| Sample  | Type          | Pb, $\mu\text{g g}^{-1}$ | $^{206}\text{Pb}/^{204}\text{Pb}$ | $^{207}\text{Pb}/^{204}\text{Pb}$ | $^{208}\text{Pb}/^{204}\text{Pb}$ | $^{207}\text{Pb}/^{206}\text{Pb}$ | $^{208}\text{Pb}/^{206}\text{Pb}$ | $^{208}\text{Pb}/^{207}\text{Pb}$ | $^{206}\text{Pb}/^{207}\text{Pb}$ | Sr, $\mu\text{g g}^{-1}$ | $^{87}\text{Sr}/^{86}\text{Sr}$ |
|---------|---------------|--------------------------|-----------------------------------|-----------------------------------|-----------------------------------|-----------------------------------|-----------------------------------|-----------------------------------|-----------------------------------|--------------------------|---------------------------------|
| 1.1.A.1 | surface       | 24.38                    | 18.3985                           | 15.6297                           | 38.3480                           | 0.8495                            | 2.0843                            | 2.4535                            | 1.1771                            | 136.05                   | 0.7110                          |
| 1.2.C.2 | surface       | 6.65                     | 18.5625                           | 15.6739                           | 38.4898                           | 0.8444                            | 2.0735                            | 2.4557                            | 1.1843                            | 26.03                    | 0.7164                          |
| 1.2.E.1 | surface       | 8.46                     | 18.3481                           | 15.6314                           | 38.3068                           | 0.8519                            | 2.0878                            | 2.4506                            | 1.1738                            | 602.93                   | 0.7153                          |
| 1.2.F   | surface       | 109.87                   | 18.5379                           | 15.6208                           | 38.4773                           | 0.8426                            | 2.0756                            | 2.4632                            | 1.1867                            | 164.55                   | 0.7173                          |
| 1.2.F   | surface       | 172.05                   | 18.4921                           | 15.6300                           | 38.5036                           | 0.8452                            | 2.0822                            | 2.4634                            | 1.1831                            | 1367.93                  | 0.7164                          |
| 1.2.F.1 | surface       | 58.88                    | 18.7570                           | 15.6783                           | 38.8025                           | 0.8359                            | 2.0687                            | 2.4749                            | 1.1964                            | 51.14                    | 0.7166                          |
| 1.2.G.1 | surface       | 23.19                    | 18.3481                           | 15.6314                           | 38.3068                           | 0.8519                            | 2.0878                            | 2.4506                            | 1.1738                            | 19.50                    | 0.7136                          |
| 2.B.2   | surface       | 29.05                    | 18.5157                           | 15.6629                           | 38.5510                           | 0.8459                            | 2.0821                            | 2.4613                            | 1.1821                            | 42.81                    | 0.7155                          |
| 2.C.1   | surface       | 15.09                    | 18.5553                           | 15.6684                           | 38.5320                           | 0.8444                            | 2.0766                            | 2.4592                            | 1.1843                            | 107.54                   | 0.7190                          |
| 2.G.1   | surface       | 37.79                    | 18.6171                           | 15.6763                           | 38.6409                           | 0.8420                            | 2.0756                            | 2.4649                            | 1.1876                            | 101.11                   | 0.7138                          |
| 2.G.2   | surface       | 15.83                    | 18.4727                           | 15.6881                           | 38.5057                           | 0.8493                            | 2.0845                            | 2.4544                            | 1.1775                            | 112.82                   | 0.7220                          |
| 2.G.2.A | surface       | 24.45                    | 18.6424                           | 15.6785                           | 38.6107                           | 0.8410                            | 2.0711                            | 2.4626                            | 1.1890                            | 89.49                    | 0.7182                          |
| 2.H.2   | surface       | 17.76                    | 18.6861                           | 15.6799                           | 38.5993                           | 0.8391                            | 2.0657                            | 2.4617                            | 1.1917                            | 17.69                    | 0.7180                          |
| 2.I.2   | surface       | 32.72                    | 18.5664                           | 15.6679                           | 38.5202                           | 0.8439                            | 2.0747                            | 2.4585                            | 1.1850                            | 252.77                   | 0.7140                          |
| 2.I.2   | surface       | 35.09                    | 18.6662                           | 15.6697                           | 38.6575                           | 0.8395                            | 2.0710                            | 2.4670                            | 1.1912                            | 202.64                   | 0.7173                          |
| 1.2.G.1 | surface       | 19.51                    | 18.2674                           | 15.6131                           | 38.2545                           | 0.8547                            | 2.0941                            | 2.4502                            | 1.1700                            | 350.57                   | 0.7135                          |
| HH01    | hammer scales | 11.71                    | 18.5719                           | 15.6728                           | 38.6313                           | 0.8439                            | 2.0801                            | 2.4649                            | 1.1850                            | 52.77                    | 0.7147                          |
| HH02    | hammer scales | 71.25                    | 18.5681                           | 15.6773                           | 38.6273                           | 0.8443                            | 2.0803                            | 2.4639                            | 1.1844                            | 30.39                    | 0.7147                          |
| HH03    | hammer scales | 113.80                   | 18.4712                           | 15.6731                           | 38.5323                           | 0.8485                            | 2.0861                            | 2.4585                            | 1.1785                            | 650.99                   | 0.7147                          |
| HH04    | hammer scales | 112.45                   | 18.4188                           | 15.6534                           | 38.4446                           | 0.8499                            | 2.0872                            | 2.4560                            | 1.1767                            | 622.46                   | 0.7147                          |
| HH05    | hammer scales | 102.81                   | 18.4670                           | 15.6693                           | 38.5134                           | 0.8485                            | 2.0855                            | 2.4579                            | 1.1785                            | 222864.45                | 0.7106                          |
| 1.2.B   | clay          | 80.23                    | 18.4101                           | 15.6346                           | 38.3759                           | 0.8492                            | 2.0845                            | 2.4546                            | 1.1775                            | 122.63                   | 0.7155                          |
| stone   | clay          | 120.15                   | 18.3814                           | 15.6339                           | 38.4528                           | 0.8505                            | 2.0919                            | 2.4596                            | 1.1757                            | 169366.87                | 0.7135                          |
| 1.2.B   | clay          | 56.03                    | 18.7090                           | 15.6649                           | 38.8867                           | 0.8373                            | 2.0785                            | 2.4824                            | 1.1943                            | 125.87                   | 0.7164                          |
| 1.2.F   | clay          | 191.90                   | 18.6785                           | 15.6502                           | 38.7055                           | 0.8379                            | 2.0722                            | 2.4732                            | 1.1935                            | 237.52                   | 0.7174                          |
| FL      | clay          | 22.92                    | 18.6723                           | 15.6848                           | 38.8381                           | 0.8400                            | 2.0800                            | 2.4762                            | 1.1905                            | 120.69                   | 0.7178                          |
| FL.1    | clay          | 137.48                   | 18.4363                           | 15.6197                           | 38.3955                           | 0.8472                            | 2.0826                            | 2.4581                            | 1.1803                            | 185.63                   | 0.7137                          |
| stone   | clay          | 80.89                    | 18.4480                           | 15.6703                           | 38.5501                           | 0.8494                            | 2.0897                            | 2.4601                            | 1.1773                            | 124.58                   | 0.7162                          |
| coal01  | coal          | 79.07                    | 18.4552                           | 15.6687                           | 38.5880                           | 0.8490                            | 2.0909                            | 2.4627                            | 1.1778                            | 75.81                    | 0.7162                          |
| coal02  | coal          | 78.69                    | 18.4583                           | 15.6726                           | 38.5971                           | 0.8491                            | 2.0910                            | 2.4627                            | 1.1777                            | 1326.55                  | 0.7123                          |
| coal03  | coal          | 91.41                    | 18.3171                           | 15.6612                           | 38.4360                           | 0.8550                            | 2.0983                            | 2.4542                            | 1.1696                            | 923.82                   | 0.7161                          |
| coal04  | coal          | 116.04                   | 18.3832                           | 15.6612                           | 38.5021                           | 0.8519                            | 2.0944                            | 2.4584                            | 1.1738                            | 919.63                   | 0.7123                          |
| coal05  | coal          | 60.38                    | 17.9380                           | 15.6496                           | 38.2337                           | 0.8722                            | 2.1308                            | 2.4431                            | 1.1462                            | 609.69                   | 0.7147                          |

| Sample  | Type | Pb, $\mu\text{g g}^{-1}$ | $^{206}\text{Pb}/^{204}\text{Pb}$ | $^{207}\text{Pb}/^{204}\text{Pb}$ | $^{208}\text{Pb}/^{204}\text{Pb}$ | $^{207}\text{Pb}/^{206}\text{Pb}$ | $^{208}\text{Pb}/^{206}\text{Pb}$ | $^{208}\text{Pb}/^{207}\text{Pb}$ | $^{206}\text{Pb}/^{207}\text{Pb}$ | Sr, $\mu\text{g g}^{-1}$ | $^{87}\text{Sr}/^{86}\text{Sr}$ |
|---------|------|--------------------------|-----------------------------------|-----------------------------------|-----------------------------------|-----------------------------------|-----------------------------------|-----------------------------------|-----------------------------------|--------------------------|---------------------------------|
| a = 1SD |      | 7.03 %                   | 0.0345 <sup>a</sup>               | 0.0275 <sup>a</sup>               | 0.0675 <sup>a</sup>               | 0.0005 <sup>a</sup>               | 0.0007 <sup>a</sup>               | 0.0007 <sup>a</sup>               | 0.0001 <sup>a</sup>               | 9.04 %                   | 0.0001 <sup>b</sup>             |
| b = 2SD |      |                          |                                   |                                   |                                   |                                   |                                   |                                   |                                   |                          |                                 |

**Table S2: Fe concentration and isotopic signature of the iron slag, hammer scale, clay and coal samples investigated.**

| Sample           | Type          | Fe, wt % | $\delta^{56}\text{Fe}$ , ‰ | $\delta^{57}\text{Fe}$ , ‰ |
|------------------|---------------|----------|----------------------------|----------------------------|
| 041              | slag          | 32.2     | 0.065                      | 0.117                      |
| 043              | slag          | 55.1     | -0.174                     | -0.189                     |
| 047              | slag          | 49.2     | -0.083                     | -0.154                     |
| 051              | slag          | 71.8     | -0.142                     | -0.172                     |
| 041-A            | slag          | 26.1     | 0.232                      | 0.306                      |
| 041-B            | slag          | 27.4     | 0.037                      | 0.068                      |
| 041-C            | slag          | 24.3     | 0.097                      | 0.132                      |
| 042              | slag          | 50.4     | -0.288                     | -0.487                     |
| 043-A            | slag          | 44.6     | -0.147                     | -0.224                     |
| 043-B            | slag          | 23.4     | -0.121                     | -0.158                     |
| 047              | slag          | 50.3     | -0.054                     | 0.065                      |
| 048              | slag          | 44.3     | -0.073                     | -0.121                     |
| 1.2.D.1          | slag          | 22.2     | -0.025                     | -0.079                     |
| 2.H.1            | slag          | 57.5     | -0.228                     | -0.307                     |
| 2F               | slag          | 42.2     | 0.111                      | 0.164                      |
| 048              | surface       | 46.3     | -0.175                     | -0.187                     |
| 1.1.A            | surface       | 43.6     | -0.138                     | -0.227                     |
| 2.G.2            | surface       | 28.7     | -0.219                     | -0.230                     |
| 2.I.2            | surface       | 11.6     | -0.165                     | -0.207                     |
| HH               | hammer scales | 37.7     | -0.228                     | -0.298                     |
| HH               | hammer scales | 46.0     | -0.287                     | -0.423                     |
| FL               | clay          | 8.2      | 0.005                      | 0.052                      |
| stone            | clay          | 10.5     | -0.236                     | -0.278                     |
| coal             | coal          | 0.9      | -0.001                     | 0.028                      |
| $\pm 2\text{SE}$ |               | 4.5 %    | 0.042                      | 0.063                      |
